# Supplementary material for: Updates on New Therapies for Patients with CKD
Source: PubMed Central journal article supplement — Kidney Int Rep. 2023 Oct 12;9(1):16–28. doi: 10.1016/j.ekir.2023.10.006 (PMC10831355; doi:10.1016/j.ekir.2023.10.006), 2023-10-12
Supplement: mmc1.pdf [file mmc1.pdf]

## **SUPPLEMENTARY TABLE**

Supplementary Table 1. Landmark studies of angiotensin receptor/neprilysin inhibition (ARNI)

Supplementary Table 2. Landmark trials of sodium glucose cotransporter-2 inhibitors

Supplementary Table 3. Landmark studies demonstrating efficacy of GLP-1 agonists

Supplementary Table 4: Landmark studies demonstrating efficacy of finerenone in chronic heart and kidney disease.

**Supplementary Table 1: Landmark studies demonstrating efficacy of angiotensin receptor/neprilysin inhibition (ARNI) in patients with heart failure and kidney disease.**

| Trial                              | Patients                                              | intervention                                                                       | Result of primary outcome                                                                                       | Secondary outcomes                                                                                                                                                                                                                 | Exclusion                                                                                                                                          |
|------------------------------------|-------------------------------------------------------|------------------------------------------------------------------------------------|-----------------------------------------------------------------------------------------------------------------|------------------------------------------------------------------------------------------------------------------------------------------------------------------------------------------------------------------------------------|----------------------------------------------------------------------------------------------------------------------------------------------------|
| PARADIGM-HF trial <sup>44,59</sup> | 8,442 patients with NYHA class II-IV HF and LVEF ≤40% | Sacubitril + Valsartan (97 mg + 103 mg) twice daily vs enalapril 10 mg twice daily | Reduction in composite outcome of CV-death or hospitalization for HF by 20 % compared to enalapril monotherapy. | <p><b>Patients with HF:</b><br/>QoL markers improved, death from any cause was lower in ARNI group.</p> <p><b>Patients with CKD:</b><br/>ARNI improved percentage decrease in eGFR annually compared to enalapril monotherapy.</p> | eGFR < 30 ml/min/1.73 m <sup>2</sup> , 25% decrease in eGFR between screening and randomization, hyperkalemia >5.2 mmol/l, symptomatic hypotension |
| PARAGON-HF trial <sup>58,61</sup>  | 4,822 patients with NYHA                              | Sacubitril +                                                                       | Reduction in cumulative risk of CV-                                                                             | <b>Patients with HF:</b>                                                                                                                                                                                                           | Same as above                                                                                                                                      |

|                                  |                                                                                         |                                                                        |                                                                                                                                                                      |                                                                                                                                                                                                                                       |                                                                                                                                                 |
|----------------------------------|-----------------------------------------------------------------------------------------|------------------------------------------------------------------------|----------------------------------------------------------------------------------------------------------------------------------------------------------------------|---------------------------------------------------------------------------------------------------------------------------------------------------------------------------------------------------------------------------------------|-------------------------------------------------------------------------------------------------------------------------------------------------|
|                                  | class II-IV with LVEF >45%, elevated natriuretic peptides, and structural heart disease | Valsartan (97 mg + 103 mg) twice daily vs valsartan 160 mg twice daily | death HF hospitalizations by 13% compared to valsartan monotherapy, although results were statistically non-significant                                              | QoL score and NYHA class from baseline have improved.<br><br><b>Patients with CKD:</b><br><br>ARNI reduced death from renal failure, progression to ESRD and > 50% decrease in eGFR annually by 50% compared to valsartan monotherapy |                                                                                                                                                 |
| UK HARP-III trial. <sup>61</sup> | 414 CKD Patients with eGFR 20 to 60 ml/min/1.73 m <sup>2</sup>                          | Sacubitril + Valsartan (97 mg + 103 mg) twice daily vs Irbesartan      | Both treatment groups had similar effect on kidney function and albuminuria, ARNI use was not associated with serious or non-serious adverse events and hyperkalemia | ARNI treatment arm had an additional effect of lowering systolic and diastolic blood pressure by 5.4mm and 2.1mm respectively; levels of troponin I and N terminal-pro BNP were reduced by 16% and 18%                                | Hyperkalemia >5.5, ACS, stroke or TIA with in previous 3 months, Patients with kidney transplant or nephrotic syndrome or chronic liver disease |

|                          |                                                                                  |                                                                                                                   |                                                                                                            |                                                                                                                                                                                                |                                                            |
|--------------------------|----------------------------------------------------------------------------------|-------------------------------------------------------------------------------------------------------------------|------------------------------------------------------------------------------------------------------------|------------------------------------------------------------------------------------------------------------------------------------------------------------------------------------------------|------------------------------------------------------------|
|                          |                                                                                  | 300 mg<br>once daily                                                                                              | compared to irbesartan<br>group                                                                            | respectively compared to<br>irbesartan monotherapy                                                                                                                                             |                                                            |
| Lee et al. <sup>62</sup> | 501 patients<br>with LVEF≤<br>35% and anuric<br>ESRD on HD or<br>PD for 6 months | Retrospec<br>tive single<br>center<br>study: 23<br>patients<br>were<br>switched<br>to ARNI<br>from ACEI<br>or ARB | ARNI use resulted in<br>significant<br>improvement in LVEF<br>from 29.7% to 40.8% in<br>patients with ESRD | Cardiac biomarkers: highly<br>sensitive troponin T and soluble<br>suppression of tumorogenicity 2<br>levels were reduced significantly<br>after treatment with ARNI during<br>the study period | Patients on cardiac<br>resynchronization<br>therapy        |
| Niu et al. <sup>63</sup> | 49 patients<br>with LVEF≤ 40<br>% and anuric                                     | Sacubitril<br>+<br>Valsartan<br>(27mg+26                                                                          | ARNI treatment group<br>had improvement in<br>echocardiographic<br>systolic parameters                     | ARNI treatment group had<br>improvement in diastolic<br>parameters compared to<br>conventional treatment group.                                                                                | Recent ACS and<br>inadequate dialysis,<br>CABG or coronary |

|  |                               |                                                                                               |                                                                                                                                                 |  |                                         |
|--|-------------------------------|-----------------------------------------------------------------------------------------------|-------------------------------------------------------------------------------------------------------------------------------------------------|--|-----------------------------------------|
|  | ESRD on HD or PD for 6 months | mg<br>titrating to<br>97 mg +<br>103 mg)<br>twice daily<br>vs<br>conventio<br>nal<br>therapy. | such as LVEF, LV end-<br>systolic volume and LV<br>internal diameter at<br>end-systolic phase<br>compared to<br>conventional treatment<br>group |  | angioplasty in the<br>follow-up period. |
|--|-------------------------------|-----------------------------------------------------------------------------------------------|-------------------------------------------------------------------------------------------------------------------------------------------------|--|-----------------------------------------|

Abbreviations: CKD-chronic kidney disease, CV-cardiovascular, eGFR-estimated glomerular filtration rate expressed in ml/min/1.73m<sup>2</sup>, HF-heart failure, LVEF-left ventricular ejection fraction, QoL- quality of life, NYHA: New York Heart Association, UACR: Urine Albumin Creatinine Ratio, ACS: acute coronary syndrome, TIA: transient ischemic attack, ESRD: end stage renal disease, HD; hemodialysis, PD: peritoneal dialysis, CRT: cardiac resynchronization therapy, CABG: coronary artery bypass grafting.

**Supplementary Table 2. Landmark studies evaluating efficacy of sodium glucose cotransporter-2 inhibitors in patients with heart failure or chronic kidney disease.**

| Trial                           | Patients                                                 | Intervention                         | Result of primary outcome                                                                                 | Secondary outcomes                                                                                                                                                                                                                                                                                                                                                                                                                         | Exclusion                                                                                                                                                                                                                             |
|---------------------------------|----------------------------------------------------------|--------------------------------------|-----------------------------------------------------------------------------------------------------------|--------------------------------------------------------------------------------------------------------------------------------------------------------------------------------------------------------------------------------------------------------------------------------------------------------------------------------------------------------------------------------------------------------------------------------------------|---------------------------------------------------------------------------------------------------------------------------------------------------------------------------------------------------------------------------------------|
| EMPEROR Preserved <sup>42</sup> | 5,988 patients with HF, NYHA classes II-IV and LVEF >40% | Empagliflozin 10 mg daily vs Placebo | Empagliflozin reduced the combined risk of CV-death or hospitalization for HF by 21 % compared to placebo | <p><b>Patients with HF:</b></p> <p>QoL improved, NT-pro BNP levels improved, functional capacity improved, lower number of HF hospitalizations requiring intensive care, lower number of hospitalizations requiring a vasopressor or positive inotrope, and lower frequency of outpatient intensification of diuretics.</p> <p><b>Patients with CKD:</b></p> <p>Annual rate of decline in eGFR was lower with empagliflozin (-1.25) vs</p> | Patients with recent CV events, heart transplant recipients, infiltrative or hypertrophic or obstructive cardiomyopathy, ICD or cardiac synchronization within 3 months, eGFR < 20 ml/min/1.73 m <sup>2</sup> , or Hb<9 at screening. |

|                               |                                                       |                                      |                                                                                                         |                                                                                                                                                                                                                                                                         |                                                                                                               |
|-------------------------------|-------------------------------------------------------|--------------------------------------|---------------------------------------------------------------------------------------------------------|-------------------------------------------------------------------------------------------------------------------------------------------------------------------------------------------------------------------------------------------------------------------------|---------------------------------------------------------------------------------------------------------------|
|                               |                                                       |                                      |                                                                                                         | placebo (-2.62), also reduced CKD progression by 5%                                                                                                                                                                                                                     |                                                                                                               |
| EMPEROR-Reduced <sup>43</sup> | 3,730 HF patients with NYHA class II-IV and LVEF ≤40% | Empagliflozin 10 mg daily vs Placebo | Empagliflozin reduced the combined risk of CV-death or hospitalization for HF by 25%                    | <p><b>Patients with HF:</b></p> <p>Lower number of HF hospitalizations by 31%, reduced all-cause death by 22%, and improvement in exercise capacity.</p> <p><b>Patients with CKD:</b></p> <p>Empagliflozin reduced CKD progression by 50%, HR: 0.50 (CI: 0.32-0.77)</p> | Same as above.                                                                                                |
| DAPA-HF <sup>45</sup>         | 4,744 HF patients with NYHA class II-IV and LVEF ≤40% | Dapagliflozin 10 mg daily vs placebo | Dapagliflozin reduced the composite risk of CV-death or hospitalization/urgent care visit for HF by 26% | HF symptoms improved                                                                                                                                                                                                                                                    | Patients who had recent treatment with or unacceptable side effects associated with SGLT-2 inhibitors; type 1 |

|                           |                                          |                                       |                                                                                                         |                                                         |                                                                                                                                                                                                                                                                                           |
|---------------------------|------------------------------------------|---------------------------------------|---------------------------------------------------------------------------------------------------------|---------------------------------------------------------|-------------------------------------------------------------------------------------------------------------------------------------------------------------------------------------------------------------------------------------------------------------------------------------------|
|                           |                                          |                                       |                                                                                                         |                                                         | diabetics; eGFR <30 ml/min/1.73 m <sup>2</sup> BSA.                                                                                                                                                                                                                                       |
| DELIVER <sup>46</sup>     | 6,263 patients with HF and LVEF >40%     | Dapaglifloz in 10 mg daily vs placebo | Dapagliflozin reduced the composite risk of CV-death or hospitalization/urgent care visit for HF by 18% | HF symptoms improved at 8 months from baseline          | Type 1 diabetics, patients with eGFR < 25 ml/min/1.73 m <sup>2</sup> , BMI >50 kg/m <sup>2</sup> ; Recent MI/ coronary revascularization, stroke/TIA, atrial fibrillation/flutter ablation; Infiltrative or hypertrophic obstructive or genetic cardiomyopathy; BMI >50 kg/m <sup>2</sup> |
| SOLOIST-WHF <sup>49</sup> | 1,222 diabetic patients hospitalized for | sotagliflozi n 200-400                | Sotagliflozin reduced the composite endpoint of CV-death or                                             | HF symptoms, and QoL improved at week 12 and at week 28 | HF class D, recent acute coronary syndrome, stroke, PCI or CABG                                                                                                                                                                                                                           |



|                      |                                                            |                                           |                                                                                                             |                                                             |                                                                                                                                                                                                                                         |
|----------------------|------------------------------------------------------------|-------------------------------------------|-------------------------------------------------------------------------------------------------------------|-------------------------------------------------------------|-----------------------------------------------------------------------------------------------------------------------------------------------------------------------------------------------------------------------------------------|
|                      | worsening HF within the last 3 months                      | mg daily vs placebo                       | hospitalization/urgent care visit for HF by 33%                                                             |                                                             | within 3 months; eGFR<30 ml/min/1.73 m <sup>2</sup> ; Infiltrative or hypertrophic obstructive cardiomyopathy                                                                                                                           |
| SCORED <sup>47</sup> | 10,584 diabetic patients with CKD (eGFR 25-60) and CV risk | sotagliflozin 200-400 mg daily vs placebo | Sotagliflozin reduced the composite endpoint of CV-death or hospitalization/urgent care visit for HF by 26% | Lower number of HF hospitalizations, HR:0.67 (CI:0.55-0.82) | DKA or HHS in past 3 months; HF class D, planned coronary revascularization procedures, EP device/mechanical support implantation or cardiac surgery after randomization.<br><br>Allergic reaction to SGLT-2 inhibitor or sotagliflozin |

|                                 |                                                                                                      |                                                 |                                                                                                   |                                                                                                                                   |                                                                                                                                                                         |
|---------------------------------|------------------------------------------------------------------------------------------------------|-------------------------------------------------|---------------------------------------------------------------------------------------------------|-----------------------------------------------------------------------------------------------------------------------------------|-------------------------------------------------------------------------------------------------------------------------------------------------------------------------|
| <p>CREDESCENCE<sup>48</sup></p> | <p>4,401 diabetics with CKD (eGFR 30-90 and UACR 300-5,000) receiving a stable dose of ACE-I/ARB</p> | <p>Canagliflozin in 100 mg daily vs placebo</p> | <p>Canagliflozin reduced the primary composite endpoint of CKD progression or CV-death by 30%</p> | <p>Empagliflozin reduced the risk of hospitalization for HF by 39%, reduced risk of CV-death or hospitalization for HF by 31%</p> | <p>Type 1 diabetics, history of DKA;<br/>Known non-diabetic renal disease; History of dialysis or kidney transplant or current immunosuppression for kidney disease</p> |
| <p>DAPA-CKD<sup>50</sup></p>    | <p>4,304 patients with CKD (eGFR 25-75 and UACR 200-5000)</p>                                        | <p>Dapagliflozin in 10 mg daily vs placebo</p>  | <p>Dapagliflozin reduced the primary composite outcome of CKD progression or CV-death by 39%</p>  | <p>Dapagliflozin reduced the CV-death or hospitalization for HF by 29%, reduced all-cause mortality by 31%</p>                    | <p>type 1 diabetics, lupus nephritis, polycystic kidney disease, antineutrophilic cytoplasmic antibody-associated vasculitis; on immunotherapy, recent CV event</p>     |

|                           |                                                                                                              |                                      |                                                                                   |                                                        |                                                                                                                                             |
|---------------------------|--------------------------------------------------------------------------------------------------------------|--------------------------------------|-----------------------------------------------------------------------------------|--------------------------------------------------------|---------------------------------------------------------------------------------------------------------------------------------------------|
| EMPA-KIDNEY <sup>51</sup> | 6,609 patients with CKD (eGFR 20-45 or, with eGFR 45-90 + UACR ≥200) and receiving a stable dose of ACEi/ARB | Empagliflozin 10 mg daily vs placebo | Empagliflozin reduced the composite outcome of CKD progression or CV-death by 28% | Empagliflozin reduced all-cause hospitalization by 14% | Polycystic kidney disease, currently on/scheduled dialysis, functioning kidney transplant; Currently receiving SGLT-2 inhibitor or ACEi/ARB |
|---------------------------|--------------------------------------------------------------------------------------------------------------|--------------------------------------|-----------------------------------------------------------------------------------|--------------------------------------------------------|---------------------------------------------------------------------------------------------------------------------------------------------|

Abbreviations: CKD-chronic kidney disease, CV-cardiovascular, eGFR-estimated glomerular filtration rate expressed in ml/min/1.73m<sup>2</sup>, HF-heart failure, LVEF-left ventricular ejection fraction, QoL- quality of life, NT-peptide: N-terminal peptide, NYHA: New York Heart Association, UACR: Urine Albumin Creatinine Ratio.

**Supplementary Table 3: Landmark studies demonstrating efficacy of GLP-1 agonists in chronic heart and kidney diseases.**

| Study                   | Patients                          | Intervention                        | Primary outcome                                                                                        | Secondary Outcome                                                 | Exclusion criteria                                                                                                                                                                                                                                                           |
|-------------------------|-----------------------------------|-------------------------------------|--------------------------------------------------------------------------------------------------------|-------------------------------------------------------------------|------------------------------------------------------------------------------------------------------------------------------------------------------------------------------------------------------------------------------------------------------------------------------|
| LEADER <sup>52</sup>    | 9,340 diabetics with high CV risk | Liraglutide 1.8 mg daily vs placebo | The composite outcome of CV-death, non-fatal AMI or non-fatal stroke was reduced with treatment by 13% | All-cause death reduced by 15% and CKD progression reduced by 22% | Type 1 DM; Use of GLP-1 agonists, DPP-4 inhibitors, pramlintide or rapid acting insulin prior to screening; Family or personal history of medullary thyroid cancer or MEN-2; ACS or stroke/TIA within 14 days before screening; Current continuous renal replacement therapy |
| SUSTAIN-6 <sup>53</sup> | 3,297 diabetics with established  | Semaglutide 0.5 mg-1 mg             | The composite outcome of CV-death, non-fatal AMI or non-fatal stroke                                   | CKD onset or progression reduced by 36%                           | Treatment with DPP 4 inhibitor within 30 days or with a GLP-1 agonists or                                                                                                                                                                                                    |

|                      |                                                                      |                                      |                                                                                                        |                                                                                                                               |                                                                                                                                                                             |
|----------------------|----------------------------------------------------------------------|--------------------------------------|--------------------------------------------------------------------------------------------------------|-------------------------------------------------------------------------------------------------------------------------------|-----------------------------------------------------------------------------------------------------------------------------------------------------------------------------|
|                      | CVD, HF, CKD stage 3-5, or with at least one CV risk factor          | once weekly vs placebo               | was reduced with treatment by 26%                                                                      |                                                                                                                               | insulin within 90 days before screening; recent CV event; chronic dialysis                                                                                                  |
| REWIND <sup>54</sup> | 9,901 diabetics ≥50 years with prior CV event or with CV risk factor | Dulaglutide 1.5 mg weekly vs placebo | The composite outcome of CV-death, non-fatal AMI or non-fatal stroke was reduced with treatment by 12% | Reduction in all-cause death by 15%, reduction in hospitalization for HF by 24%, reduction in CKD onset or progression by 15% | eGFR < 15 ml/min/1.73 m <sup>2</sup> or on chronic dialysis at screening; Severe hyperglycemia, DKA in last years; recent CV event; Life expectancy < 1 year for any reason |
| EXSCEL <sup>55</sup> | 14,752 diabetics                                                     | Exenatide 2mg weekly vs placebo      | The composite outcome of CV-death, non-fatal AMI or non-fatal stroke was non-inferior to placebo.      | 14% reduction in the risk of CKD onset or progression                                                                         | Type 1 DM or DKA or > 2 hypoglycemia episodes in past; ESRD or eGFR < 30 ml/min/1.73 m <sup>2</sup> ; Personal or family history of                                         |

|                            |                                                                          |                                                                         |                                                                                                                                             |                                                                                                                            |                                                                                                                                                                                                                          |
|----------------------------|--------------------------------------------------------------------------|-------------------------------------------------------------------------|---------------------------------------------------------------------------------------------------------------------------------------------|----------------------------------------------------------------------------------------------------------------------------|--------------------------------------------------------------------------------------------------------------------------------------------------------------------------------------------------------------------------|
|                            |                                                                          |                                                                         |                                                                                                                                             |                                                                                                                            | medullary thyroid cancer or MEN-2.                                                                                                                                                                                       |
| AMPLITUDE-0. <sup>79</sup> | 4,076<br>Diabetics and with CVD or CKD with at least one CV risk factor. | Efpeglenatide<br>4 mg or 6 mg weekly subcutaneous injections vs placebo | The composite outcome of CV- death or non-fatal AMI or non-fatal stroke or death from undetermined causes was reduced with treatment by 27% | Efpeglenatide improved outcomes in a dose-response relationship and decrease in kidney function or microalbuminuria by 32% | Uncontrolled gastroparesis, reflux, prolonged nausea and vomiting, pancreatitis, severe retinal disease, eGFR < 25ml/min/m <sup>2</sup> or use of GLP-1 receptor agonist or a DPP-4 inhibitor with in previous 3 months. |

|                                |                                                                                           |                                                                                               |                                                                                                                  |                                                                                                                                                                              |                                                                                                                                                      |
|--------------------------------|-------------------------------------------------------------------------------------------|-----------------------------------------------------------------------------------------------|------------------------------------------------------------------------------------------------------------------|------------------------------------------------------------------------------------------------------------------------------------------------------------------------------|------------------------------------------------------------------------------------------------------------------------------------------------------|
| PIONEER 6 trial <sup>75</sup>  | 3,183 diabetics ≥50 years with CVD/CKD or, ≥60 years with CV risk factors                 | Semaglutide 14 mg oral once daily vs placebo                                                  | The composite outcome of CV-death, non-fatal AMI or non-fatal stroke was non-inferior to placebo.                | Reduction in HF readmissions and hospitalizations for unstable angina were not statistically significant                                                                     | Use of GLP-1 agonists, DPP-4 inhibitors, pramlintide within 90 days before screening, ESRD or eGFR <30 ml/min/1.73 m <sup>2</sup> , recent CV event. |
| Heerspink et al. <sup>77</sup> | Post hoc analysis of SURPASS-4 trial: 2,002 diabetics with BMI>25 and CVD or risk factors | Tirzepatide 5 mg or 10 mg or 15 mg subcutaneous injection weekly vs titrated insulin glargine | Tirzepatide reduced risk of incident CKD with more pronounced renal benefits in subgroups with eGFR <60 (vs ≥60) | Tripeptide reduced the composite kidney endpoint of 40% decrease in eGFR from baseline, progression to ESRD, death from kidney failure or new onset macroalbuminuria by 42%. | Type 1 diabetes, history of acute or chronic pancreatitis, family or personal history of medullary thyroid cancer or MEN-2, recent CV event.         |

Abbreviations: AMI-acute myocardial infarction, BMI-body mass index in kg/m<sup>2</sup>, CKD-chronic kidney disease, CV-cardiovascular, CVD-cardiovascular disease, HF-heart failure, HTN- hypertension, MEN- multiple endocrine neoplasm.

**Supplementary Table 4: Landmark studies demonstrating efficacy of finerenone in chronic heart and kidney diseases.**

| <b>Study</b>                     | <b>Patients</b>                                                                                        | <b>Intervention</b>                             | <b>Primary outcome</b>                                                                                                                                           | <b>Secondary outcome</b>                                                                                                                          | <b>Exclusion criteria</b>                                                                                                                                                                                                       |
|----------------------------------|--------------------------------------------------------------------------------------------------------|-------------------------------------------------|------------------------------------------------------------------------------------------------------------------------------------------------------------------|---------------------------------------------------------------------------------------------------------------------------------------------------|---------------------------------------------------------------------------------------------------------------------------------------------------------------------------------------------------------------------------------|
| FIDELIO-DKD trial. <sup>85</sup> | 5734 diabetics with CKD (eGFR 25-60+ UACR: 30-300+ Diabetic retinopathy or eGFR 25-75 + UACR 300-5000) | Finerenone 10 mg or 20 mg once daily vs placebo | The composite outcome of death from renal causes, kidney failure and sustained decrease of at least 40% in eGFR from baseline was reduced with treatment by 18%. | The composite outcome of CV-death, non-fatal AMI or non-fatal stroke or HF-hospitalization was reduced with treatment by 13% compared to placebo. | ACS, stroke or TIA with in the previous 30 days, severe hyperglycemia, uncontrolled hypertension, severe nondiabetic kidney disease, symptomatic hypotension, ESRD on dialysis or kidney transplant, chronic symptomatic HFrEF. |
| FIGARO-DKD trial. <sup>86</sup>  | 7437 diabetics with CKD (eGFR 25-90+ UACR: 30-300 or eGFR $\geq$ 60 +                                  | Finerenone 10 mg or 20 mg once daily vs placebo | The composite outcome of CV-death, non-fatal AMI or non-fatal stroke or HF-hospitalization was reduced with treatment by 18%, majority of benefit                | The composite outcome of death from renal causes, kidney failure and sustained decrease of at least 40% in eGFR from baseline was                 | same as above                                                                                                                                                                                                                   |



|                                             |                                           |                                                 |                                                                                                                                                                              |                                                                                                                                                                                      |               |
|---------------------------------------------|-------------------------------------------|-------------------------------------------------|------------------------------------------------------------------------------------------------------------------------------------------------------------------------------|--------------------------------------------------------------------------------------------------------------------------------------------------------------------------------------|---------------|
|                                             | UACR 300-5000)                            |                                                 | primarily driven by decrease in HF hospitalization by 29%.                                                                                                                   | reduced with treatment by 13%.                                                                                                                                                       |               |
| The FIDELITY pooled analysis. <sup>87</sup> | 13,026 diabetics with CKD at risk for HF. | Finerenone 10 mg or 20 mg once daily vs placebo | The composite outcome of CV-death, non-fatal AMI or non-fatal stroke or HF-hospitalization was reduced with treatment by 14% compared to placebo across the spectrum of CKD. | The composite outcome of death from renal causes, kidney failure and sustained decrease of at least 57% in eGFR from baseline was reduced with treatment by 23% compared to placebo. | Same as above |

Abbreviations: ACS- acute coronary syndrome, AMI-acute myocardial infarction, eGFR-estimated glomerular filtration rate expressed in ml/min/1.73m<sup>2</sup>, UACR: urinary albumin-creatinine ratio, CKD-chronic kidney disease, CV-cardiovascular, CVD-cardiovascular disease, ESRD- end stage renal disease, HF-heart failure, HTN- hypertension, HFrEF: Heart failure with reduced ejection fraction, TIA-transient ischemic attack.
